# SNP (−617C>A) in ARE-Like Loci of the NRF2 Gene: A New Biomarker for Prognosis of Lung Adenocarcinoma in Japanese Non-Smoking Women

Yasuko Okano<sup>1,2</sup>, Uru Nezu<sup>1,3</sup>, Yasuaki Enokida<sup>1,4</sup>, Ming Ta Michael Lee<sup>5,6</sup>, Hiroko Kinoshita<sup>1</sup>, Alexander Lezhava<sup>1</sup>, Yoshihide Hayashizaki<sup>1</sup>, Satoshi Morita<sup>6</sup>, Masataka Taguri<sup>7</sup>, Yasushi Ichikawa<sup>2</sup>, Takeshi Kaneko<sup>1,8</sup>, Yutaka Natsumeda<sup>9</sup>, Tomoyuki Yokose<sup>10</sup>, Haruhiko Nakayama<sup>11</sup>, Yohei Miyagi<sup>12</sup>, Toshihisa Ishikawa<sup>1\*</sup>

**1** Omics Science Center, RIKEN Yokohama Institute, Yokohama, Japan, **2** Department of Clinical Oncology, Yokohama City University Graduate School of Medicine, Yokohama, Japan, **3** Department of Clinical Pharmacology and Therapeutics, Graduate School of Medicine, University of the Ryukyus, Okinawa, Japan, **4** Division of Thoracic and Visceral Organ Surgery, Gunma University Graduate School of Medicine, Maehashi, Japan, **5** Laboratory for International Alliance on Genomic Research, RIKEN Center for Integrative Medical Sciences, Yokohama, Japan, **6** Institute of Biomedical Sciences, Academia Sinica, Taipei, Taiwan, **7** Department of Biostatistics and Epidemiology, Yokohama City University Medical Center, Yokohama, Japan, **8** Respiratory Disease Center, Yokohama City University Medical Center, Yokohama, Japan, **9** Department of Clinical Research, Yokohama City University Graduate School of Medicine, Yokohama, Japan, **10** Department of Pathology, Kanagawa Cancer Center Research Institute, Yokohama, Japan, **11** Department of Thoracic Surgery, Kanagawa Cancer Center Research Institute, Yokohama, Japan, **12** Kanagawa Cancer Center Research Institute, Yokohama, Japan

## Abstract

**Purpose:** The transcription factor NRF2 plays a pivotal role in protecting normal cells from external toxic challenges and oxidative stress, whereas it can also endow cancer cells resistance to anticancer drugs. At present little information is available about the genetic polymorphisms of the *NRF2* gene and their clinical relevance. We aimed to investigate the single nucleotide polymorphisms in the *NRF2* gene as a prognostic biomarker in lung cancer.

**Experimental Design:** We prepared genomic DNA samples from 387 Japanese patients with primary lung cancer and detected SNP (c.−617C>A; rs6721961) in the ARE-like loci of the human *NRF2* gene by the rapid genetic testing method we developed in this study. We then analyzed the association between the SNP in the *NRF2* gene and patients' overall survival.

**Results:** Patients harboring wild-type (WT) homozygous (c.−617C/C), SNP heterozygous (c.−617C/A), and SNP homozygous (c.−617A/A) alleles numbered 216 (55.8%), 147 (38.0%), and 24 (6.2%), respectively. Multivariate logistic regression models revealed that SNP homozygote (c.−617A/A) was significantly related to gender. Its frequency was four-fold higher in female patients than in males (10.8% female vs 2.7% male) and was associated with female non-smokers with adenocarcinoma. Interestingly, lung cancer patients carrying *NRF2* SNP homozygous alleles (c.−617A/A) and the 309T (WT) allele in the *MDM2* gene exhibited remarkable survival over 1,700 days after surgical operation (log-rank  $p=0.021$ ).

**Conclusion:** SNP homozygous (c.−617A/A) alleles in the *NRF2* gene are associated with female non-smokers with adenocarcinoma and regarded as a prognostic biomarker for assessing overall survival of patients with lung adenocarcinoma.

**Citation:** Okano Y, Nezu U, Enokida Y, Lee MTM, Kinoshita H, et al. (2013) SNP (−617C>A) in ARE-Like Loci of the NRF2 Gene: A New Biomarker for Prognosis of Lung Adenocarcinoma in Japanese Non-Smoking Women. PLoS ONE 8(9): e73794. doi:10.1371/journal.pone.0073794

**Editor:** Pan-Chyr Yang, National Taiwan University, Taiwan

**Received:** February 9, 2013; **Accepted:** July 26, 2013; **Published:** September 11, 2013

**Copyright:** © 2013 Okano et al. This is an open-access article distributed under the terms of the Creative Commons Attribution License, which permits unrestricted use, distribution, and reproduction in any medium, provided the original author and source are credited.

**Funding:** This study was supported by a Japan Science and Technology Agency (JST) research project named "Development of the world's fastest SNP detection system" (to TI) and Research This study was supported by a grant for RIKEN Omics Science Center from the Ministry of Education, Culture, Sports, Science and Technology (to YH). The funders had no role in study design, data, collection and analysis, decision to publish, or preparation of the manuscript.

**Competing Interests:** The authors have declared that no competing interests exist.

\* E-mail: toshihisa.ishikawa.r@gmail.com

## Introduction

Lung cancer is the leading cause of cancer-related death in many industrial countries. It is classified into two major types, namely, small-cell lung carcinoma (SCLC) and non-small-cell lung carcinoma (NSCLC). While long-term exposure to cigarette smoke is the most common cause of lung cancer (80–90% of lung cancers), non-smokers account for 10–15% of lung cancer cases,

which are often attributed to a combination of genetic and environmental factors [1–3]. The transcription factor NF-E2-related factor 2 (NRF2) is known to control cellular adaptation/protection to reactive oxygen species and electrophiles by inducing antioxidation and detoxification genes [4–6] as well as mediate cancer cell proliferation and drug resistance [7–12]. We have undertaken the present study to examine the clinical impact of the

*NRF2* gene and its genetic polymorphisms on the risk and prognosis of lung cancer.

NRF2 is a “cap’n’collar” basic region-leucine zipper (CNC-bZip) transcription factor and plays a pivotal role in the induction of antioxidant response element (ARE)-regulated genes [4–13]. Under non-stressed conditions, NRF2 protein is associated with Kelch-like ECH associating protein 1 (*KEAP1*) [14]. KEAP1 is known to be a negative regulator of NRF2 by retrieving it in the cytoplasm. Oxidative stress and/or electrophilic attack lead to the dissociation of NRF2 from KEAP1 and thereby the NRF2 protein is translocated into the nucleus. NRF2 together with small multiple alignment format (MAF) sequences binds to ARE sequences [15]. Many genes encoding detoxifying and antioxidant enzymes have been found to be regulated by NRF2 [4–6,15–18]. It has recently been reported that NRF2 contributes to malignant phenotypes of cancer cells *in vitro*, including aggressive cell proliferation, drug resistance, and metabolic re-programming [7–11,19,20]. In this context, the *NRF2* gene is considered to play split roles, for example, in the protection of normal cells and progression of cancer malignancy.

In 2004, Yamamoto and colleagues first reported the structure of the *NRF2* gene and found three SNPs (–653A>G, –651G>A, and –617C>A) and one triplet repeat polymorphism in its regulatory region [21]. Three years later, Marzec *et al.* examined the impact of those SNPs on the regulation of *NRF2* gene expression [22]. In transient transfection assays, they found that the –617C>A SNP significantly affects basal NRF2 protein levels and its function *in vitro* [22]. SNP –617C>A was found to be associated with a higher risk of oxidant-induced acute lung injury in humans [22]. It has been reported that a SNP (c.–617C>A) in the ARE-like loci of the human *NRF2* gene is important for self induction of the *NRF2* gene. *NRF2* regulates the transcription of numerous phase II drug-metabolizing enzymes and phase III drug-transporters (*e.g.*, ABCC1, ABCC2, ABCC4, and ABCG2) in response to oxidative stress *via* direct binding to the ARE sequences in those target genes [23–26]. At present, however, little information is available as to the clinical impact of genetic polymorphisms of the *NRF2* gene and the prognosis of lung cancer.

To gain insight into the genetic polymorphisms of the *NRF2* gene, we have developed rapid genotyping primer sets by utilizing the SmartAmp method, an isothermal DNA amplification process [27,28]. Among a total of 387 lung cancer patients, we found that SNP (c.–617C>A) in the *NRF2* gene is a prognostic biomarker for assessing the gender (female)-related risk of lung adenocarcinomas in the Japanese non-smoking sub-population of lung cancer patients. The epidermal growth factor receptor (*EGFR*) gene was frequently mutated in those female patients harboring the SNP homozygous SNP allele (–617A/A), suggesting a potential link between the SNP homozygote (–617A/A) and *EGFR* gene mutations. Furthermore, NRF2 reportedly regulates expression of the *MDM2* gene that encodes a negative regulator of p53, and this study shows that lung cancer patients with homozygous SNP alleles (–617A/A) in the *NRF2* gene and the 309T (WT) allele in the *MDM2* gene had markedly better overall survival. This is the first report providing clinical evidence that homozygous SNP (–617A/A), as one of the intrinsic genetic polymorphisms in the *NRF2* gene, is associated with the overall survival of lung cancer patients. Our clinical research data strongly suggest that the SNP homozygous allele (–617A/A) is a useful biomarker for clinical diagnosis.

## Results

### Clinicopathological Characterization

The clinicopathological characterization data for the 387 primary lung cancer patients are summarized in Table 1. The patient population comprised 221 men and 166 women, with an overall mean age of 66 years (range 35 to 87 years). The histological type of lung cancer was determined according to the protocol of the third World Health Organization/International Association for the Study of Lung Cancer Classifications [29]. Among the lung cancer patients, 298 were classified as having adenocarcinomas and 89 non-adenocarcinomas. The p-stage was determined by pathological examination of surgical specimens for 376 patients, and their tumours were staged according to the tumor nodes metastasis (TNM) classification of malignant tumours: 292, 46, 35, and 3 patients were respectively classified into stages I, II, III, and IV. For the remaining 11 patients, the p-stage could not be determined. The smoking history was obtained from each lung cancer patient at Kanagawa Cancer Center Research Institute: 154 patients had no smoking history, whereas 233 patients were smokers.

### Preparation of Genotyping Primers for Detection SNP (c.–617 C>A) in *NRF2* Gene

The *NRF2* gene is located on the negative strand of genomic DNA at q31.2 of chromosome 2. To create the template for preparation of genotyping primers, we synthesized double stranded DNA encoding a 424-bp region of nt.178129735 to nt.178130158, including the SNP (c.–617 C>A) in the *NRF2* gene by means of PCR with human genomic DNA. PCR primers used for the DNA synthesis were GACCACTCTCCGACCTAAAGG (forward) and CGAGATAAAGAGTTGTTTGCAGAA (reverse).

**Table 1.** Clinicopathological characterization of primary lung cancer patients.

| Variable               | No. of patients | (%)    |
|------------------------|-----------------|--------|
| <b>Gender</b>          |                 |        |
| Male                   | 221             | (57.1) |
| Female                 | 166             | (42.9) |
| <b>Age (years old)</b> |                 |        |
| ≤50                    | 25              | (6.4)  |
| >50                    | 362             | (93.5) |
| <b>Histopathology</b>  |                 |        |
| Adeno                  | 298             | (77.0) |
| Non-adeno              | 89              | (23.0) |
| <b>Smoking</b>         |                 |        |
| Non-smoker             | 154             | (39.8) |
| Smoker                 | 233             | (60.2) |
| <b>p-Stage</b>         |                 |        |
| I                      | 292             | (75.4) |
| II                     | 46              | (11.9) |
| III                    | 35              | (9.0)  |
| IV                     | 3               | (0.8)  |
| Undetermined           | 11              | (2.8)  |

Ages of all patients, 66.4±9.9 (mean±S.D.).

Abbreviation: Adeno, adenocarcinoma.

doi:10.1371/journal.pone.0073794.t001

The resulting PCR product was then inserted into the TA-cloning site of the pGEM®-T Easy Vector (Promega, Madison, WI, USA). The vector was amplified in JM109 High Efficiency Competent Cells (Promega), and vector DNA was purified by using the GeneJET™ Plasmid Miniprep Kit (Fermentas, Thermo Fisher Scientific Inc., Waltham, MA, USA). The sequence of the inserted DNA was analyzed with a laser-based automated DNA sequencer (ABI PRISM 3100 DNA Analyzer, Applied Biosystems Ltd., Tokyo, Japan). We designed a number of SNP-typing primer candidates and repeatedly tested them by using the vector-inserted DNA as a template until we obtained the best primer set.

The schematic illustration in Figure 1A shows the annealing sites of the best primer set, which comprises four different primers, *i.e.*, TP, OP, FP, and BP. The TP primer was designed such that its turn-back region can discriminate the nucleotide of C or A at c.-617 in the negative DNA strand extended from the 3'-end of the primer (see Figure 1A). Furthermore, two SNPs, c.-651G>A and c.653A>G, were not included in the annealing sites of the four primers. Figure 1B depicts the sequences of primers in the WT (-617C)-typing and SNP (-617)-typing sets. Excitonic dye was linked to thymine in the FP primer as symbolized by "Z" in the lower panel of Figure 1B.

Figure 1C shows the time courses of genotyping reactions as functions of fluorescence intensity. By using the genotyping primer sets, we could detect the WT homozygote (-617C/C), WT/SNP heterozygote (-617C/A), and SNP homozygote (-617A/A) in genomic DNA samples. These results were verified by DNA sequence analysis. Namely, we performed sequencing analysis for determination of the WT homozygote (-617C/C), WT/SNP heterozygote (-617C/A), and SNP homozygote (-617A/A) in those genomic DNA samples. We tested 24 samples for each group (*i.e.*, C/C, C/A, and A/A) and confirmed the 100% accordance between the SmartAmp method and the DNA sequencing analysis method.

### Detection of SNP (c.-617 C>A) in the *NRF2* Gene in Lung Cancer Patients

Using the genomic DNA samples prepared from a total of 387 lung cancer patients, we have detected WT and SNP alleles in the *NRF2* gene by the rapid genotyping method described above. Table 2 summarizes these results, showing that 216, 147, and 24 patients could be typed as WT homozygote (-617C/C), WT/SNP heterozygote (-617C/A), and SNP homozygote (-617A/A), respectively. Accordingly, the allele frequency was calculated to be 74.8% and 25.2% for WT (c.-617C) and SNP (c.-617A), respectively, when both male and female patients were grouped together. It is of interest to note, however, that the allele frequency of SNP (c.-617A) was 28.6% for female patients, compared with 22.6% for male patients. Indeed, 18 female patients carried the SNP homozygote (-617A/A), a number three-fold higher than that of male patients. The ratio of homozygous SNP (-617A/A) was 10.8% for female patients, about four-fold higher than the 2.7% found in males (Table 2;  $P=0.004$ ). In contrast, the ratios of WT homozygote (-617C/C) and heterozygote (-617 C/A) were moderately higher in male patients than in female patients (Table 2). On the other hand, with respect to smoking experience, the ratio of homozygous SNP (-617A/A) was 10.4% in the non-smoker sub-population, being about three times ( $P=0.021$ ) higher than the ratio (4.5%) observed in the smokers (Table 2).

By multivariate analysis, the SNP homozygote (-617A/A) in the *NRF2* gene was found to be independently associated with gender (Table 3). Among a total of 20 adenocarcinoma patients (females+males) carrying the SNP homozygote (-617A/A), 16 patients were females who had no cigarette-smoking experience

(Table 4). In contrast, there were no male adenocarcinoma patients in the sub-group of non-smokers carrying the SNP homozygote (-617A/A) (Table 4). These results demonstrate a marked gender difference in terms of non-smoking patients carrying the SNP homozygote (-617A/A).

To gain more insight into the gender difference among 24 patients homozygous for the SNP (c.-617A/A), we have analyzed the genetic polymorphisms of human *CYP2A6\*4* (whole gene deletion) and the numbers of (GT)<sub>n</sub> repeats in the *HO-1* gene 5'-flanking region. These data are summarized in Table 5. *CYP2A6\*4/\*4* (whole gene deletion) was found in only one female patient in this subgroup (Table 5), whereas among 387 lung cancer patients, *CYP2A6\*4/\*4* was detected in seven patients (1.8%) with lung adenocarcinoma. The number of (GT)<sub>n</sub> repeats in the *HO-1* gene 5'-flanking region varied greatly (14 to 34 repeats) among these 24 patients.

Interestingly, as shown in Table 5, either exon 19 or exon 21 of the *EGFR* gene was frequently mutated in female patients who were non-smokers and had homozygous SNP alleles (-617A/A). Two of those patients were diagnosed as p-stage IIA (cases 1 and 16). They were treated first surgically and then with gefitinib. These patients had no relapse over 1879 days (case 1) and 939 days (case 16).

### Association of SNP (c.-617 C>A) in the *NRF2* Gene with Overall Survival of Lung Cancer Patients

We investigated a potential association between SNP (c.-617 C>A) in the *NRF2* gene and the overall survival of lung cancer patients, since we could obtain follow-up information on 369 patients among the total of 387 lung cancer patients over 1,700 days after surgical operation at Kanagawa Cancer Center. A survival Kaplan-Mayer plot is shown in Figure 2A. Our univariate analysis has revealed that lung cancer patients (p-stages I to IV) carrying homozygous SNP alleles (-617A/A) in the *NRF2* gene experienced significantly better overall survival, as compared with patients with heterozygous alleles (c.-617C/A) (log-rank  $P=0.021$ ). In contrast, no association was found between patients with homozygous WT alleles (-617C/C) and those with heterozygous alleles (c.-617C/A) (Figure 2A). It is important to mention that one female patient with the homozygous SNP (-617A/A) (case 5 in Table 5) died due to primary pancreatic cancer during the follow-up study.

We further analyzed the associations between the *NRF2* genotypes and patients' overall survival in the p-stage I of non-small cell lung cancer (NSCLC) including adenocarcinoma, squamous cell cancer, and large cell cancer. In the case of stage I, patients (n = 285) were treated by surgical excision of the tumor, with no follow-up treatment by adjuvant therapy or chemotherapy. Nonetheless, patients harboring homozygous alleles (-617A/A) in the *NRF2* gene exhibited the best record of overall survival among the members of these three different allele groups (Figure 2B).

### Potential Link between *NRF2* and *MDM2* Genotypes

*NRF2* reportedly regulates expression of the *MDM2* gene that encodes a crucial negative regulator of p53. To gain insight into a potential link between *MDM2* and *NRF2* genotypes, we have analyzed the SNP (c.309T>G) in the *MDM2* gene as well as the SNP (-617C>A) in the *NRF2* gene using the genomic DNA samples from lung cancer patients. Table 6 summarizes the corresponding results, where the number of patients harboring T/T, T/G, or G/G genotype in the *MDM2* gene has been given for each genotype of the *NRF2* gene (*i.e.*, -617C/C, C/A, or A/A). In the genotype groups of -617C/C and -617C/A, the 309G (SNP)

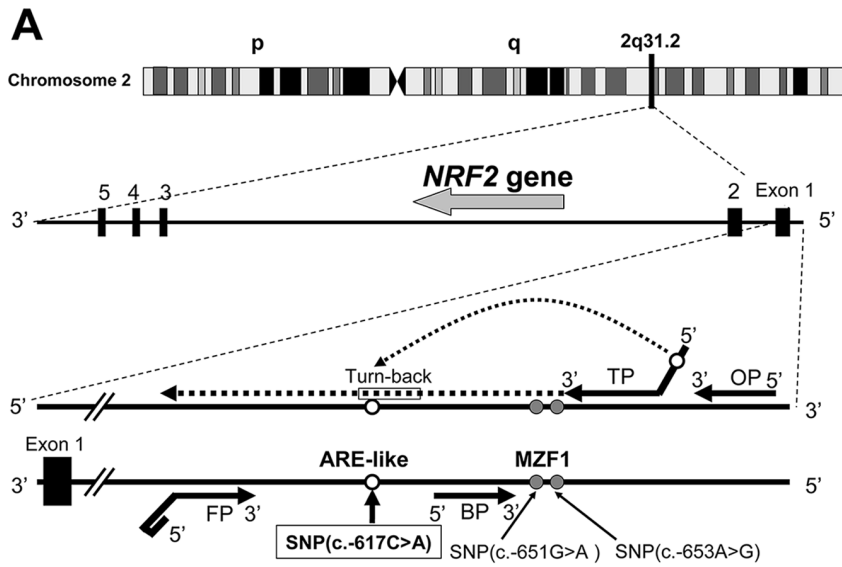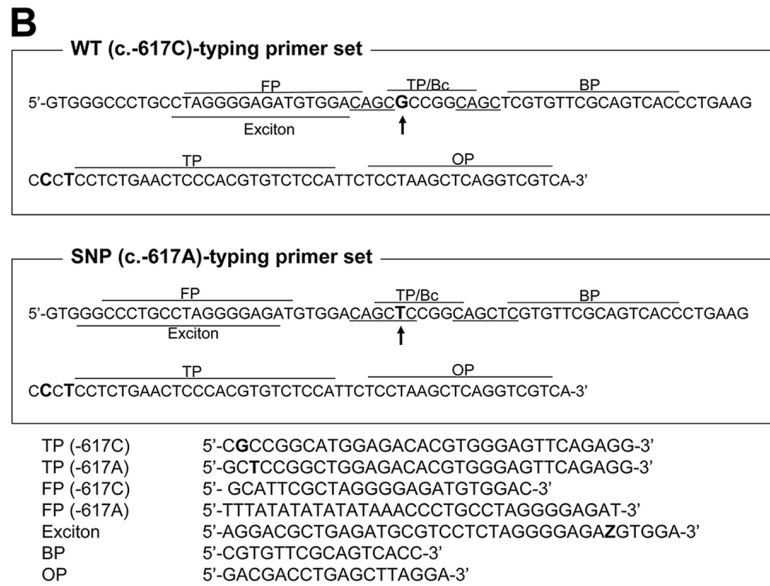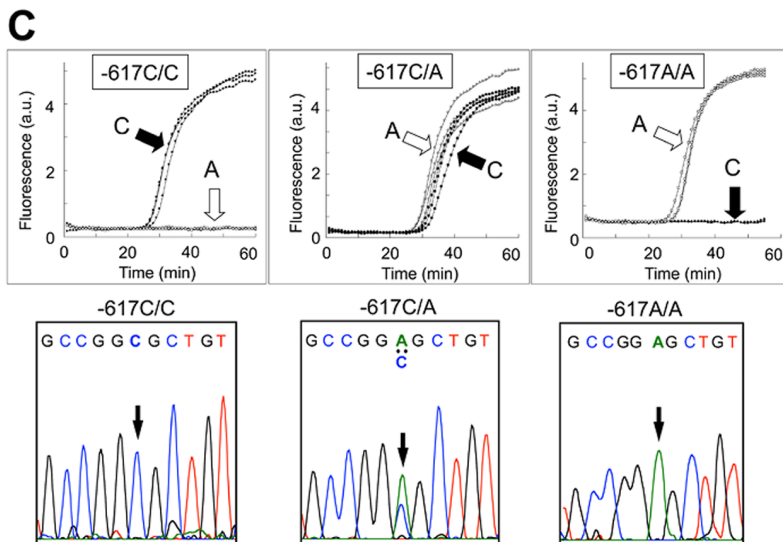

**Figure 1. SmartAmp-based detection of SNP (c.-617C>A) in the *NRF2* gene.** SNP (c.-617C>A) resides in the promoter region of the *NRF2* gene on chromosome 2q31.2. Panel **A** presents a schematic illustration of annealing sites of the TP, FP, and OP primers. Panel **B** shows cDNA encoding a partial sequence of the *NRF2* gene and primer annealing sites. Panel **C** depicts the results of SNP detection. a.u. = arbitrary unit. doi:10.1371/journal.pone.0073794.g001

allele frequency was 0.606 and 0.541, respectively. In contrast, the SNP allele frequency was found to be markedly lower (0.333) in the genotype group of *NRF2* -617A/A. In the case of adenocarcinoma, female patients harboring 309T/T, T/G, and G/G genotype in the *MDM2* gene were 7, 8, and 1, respectively (Table S1); most patients were harboring the 309T (WT) allele in the *MDM2* gene.

## Discussion

### SNP (c.-617C>A) in the *NRF2* Gene and Female Non-smokers with Adenocarcinoma

Recent genome-wide association studies (GWAS) have identified several loci associated with lung cancer susceptibility in never-smoking women in Asia; they were, 5p15.33 (rs2736100) [30], 6p21.3 (rs3817963) [30], 3q28 (rs10937405 and rs4488809) [31], 10q25.2 (rs7086803) [32], 6q22.2 (rs9387478) [32], and 6p21.32 (rs2395185) [32].

In the present study, differing from those reports, we found that SNP (c.-617C>A; rs6721961) in the *NRF2* gene located on chromosome 2q31.2 is associated with Japanese non-smoking female patients with adenocarcinoma and their overall survival. While the allele frequency of SNP c.-617C>A in the *NRF2* gene was estimated to be 25.2%, non-smoking females harboring homozygous alleles (-617A/A) had a markedly higher incidence of adenocarcinoma (Table 4, Table 5), as compared with non-smoking males harboring the same genotype. In other words, the -617 C>A SNP in the ARE-like loci of the human *NRF2* gene seems to be associated with female non-smokers with adenocar-

cinoma. Furthermore, it is noteworthy that the *EGFR* gene was frequently mutated in female patients who were non-smokers and had homozygous SNP alleles (-617A/A) in the *NRF2* gene (Table 5), suggesting a potential link between the SNP homozygote (-617A/A) and *EGFR* gene mutations.

Recent studies have demonstrated that mutations in the tyrosine kinase domain of the *EGFR* are frequently found among non-smoker patients with NSCLC [33]. Approximately 90% of these mutations are exon 19 deletions or exon 21 L858R point mutations in the tyrosine kinase domain [34]. In the vast majority of cases, *EGFR* mutations are non-overlapping with other oncogenic mutations (e.g., *KRAS* mutations, *ALK* rearrangements) found in NSCLC [34]. A large randomized clinical study named the "IRESSA Pan-Asian Study (IPASS)" has reported that high rates of mutations in the *EGFR* gene were observed in female NSCLC patients without smoking experience [35]. A high incidence of *EGFR* gene mutations was reported in female non-smokers with adenocarcinoma of lung: 30–40% in East Asians, as compared with 15% in Caucasians [36–38]. Both *EGFR* gene mutations and homozygous SNP alleles (-617A/A) in the *NRF2* gene were frequently observed in Japanese female adenocarcinoma patients without smoking experience (Table 4). As shown in Table 7, ethnic group-dependent difference was observed in the *NRF2* genotype, where the frequency of the -617A allele is high in Japanese, Taiwanese, and Chinese populations. Thus, it is of great interest to investigate the link between the SNP homozygote (-617A/A) and *EGFR* gene mutations and to gain insight into the underlying molecular mechanism.

### SNP (c.-617C>A) in the *NRF2* Gene as a Biomarker for Prognosis of Lung Cancer

The *NRF2* gene is regarded as a double-edged sword. It plays an important role in protecting normal cells from external toxic challenges and oxidative stress, whereas it can also endow cancer cells resistance to anticancer drugs. Recently it has been reported that NRF2 contributes to the malignant phenotypes of cancer cells *in vitro*, including aggressive cell proliferation, drug resistance, and metabolic re-programming [8,20]. Indeed, NRF2 activation is involved in the emergence of cancer resistance to various anticancer drugs by transcriptionally activating a battery of self-defense genes, such as those encoding antioxidant enzymes, phase

**Table 2. Classification of primary lung cancer patients with respect to *NRF2* genotypes, gender, and histopathology.**

|                   | <i>NRF2</i> gene SNP (-617) |            |           | P-value* |
|-------------------|-----------------------------|------------|-----------|----------|
|                   | C/C                         | C/A        | A/A       |          |
| Patients          | 216 (55.8)                  | 147 (38.0) | 24 (6.2)  |          |
| Gender*           |                             |            |           |          |
| Male              | 127 (57.5)                  | 88 (39.8)  | 6 (2.7)   |          |
| Female            | 89 (53.6)                   | 59 (35.5)  | 18 (10.8) | 0.004    |
| Histopathology    |                             |            |           |          |
| Adeno             | 164 (55.0)                  | 114 (38.3) | 20 (6.7)  |          |
| Non-adeno         | 52 (58.4)                   | 33 (37.0)  | 4 (4.5)   | 0.687    |
| Smoking behavior* |                             |            |           |          |
| Smoker            | 133 (58.4)                  | 92 (37.0)  | 8 (4.5)   |          |
| Non-smoker        | 83 (53.9)                   | 55 (35.7)  | 16 (10.4) | 0.021    |
| p-Stage           |                             |            |           |          |
| I                 | 156 (53.4)                  | 114 (39.0) | 22 (7.5)  |          |
| II                | 28 (60.9)                   | 16 (34.8)  | 2 (4.3)   |          |
| III               | 23 (65.7)                   | 12 (34.3)  | 0 (0)     |          |
| IV                | 1 (33.3)                    | 2 (66.7)   | 0 (0)     | 0.459    |

The number of patients (%).

\*P- values were calculated by Fisher's exact test.

Abbreviation: Adeno, adenocarcinoma.

doi:10.1371/journal.pone.0073794.t002

**Table 3. Logistic regression analysis for evaluation of the association among homozygous SNP alleles (-617A/A) in the *NRF2* gene and gender/smoking experience of lung cancer patients.**

| Variable | P     | Odds Ratio | 95% CI        |
|----------|-------|------------|---------------|
| Gender   | 0.041 | 3.48       | 1.05 to 11.51 |
| Smoking  | 0.463 | 0.66       | 0.22 to 2.00  |

Abbreviation: CI, confidence interval.

Gender code: 1 = female; 0 = male.

Smoking experience code: 1 = smoker; 0 = non-smoker.

The multivariate logistic regression analysis was performed under two categories, i.e., the gender (female and male) and the smoking experience (smoker and non-smoker).

doi:10.1371/journal.pone.0073794.t003

**Table 4.** Classification of primary lung cancer patients with respect to *NRF2* genotypes, smoking behavior, adenocarcinoma, and gender.

|                  | NRF2 gene SNP (-617) |     |     | P-value* |
|------------------|----------------------|-----|-----|----------|
|                  | C/C                  | C/A | A/A |          |
| Patients (M+F)   | 216                  | 147 | 24  |          |
| Smoking behavior |                      |     |     |          |
| Smoker (M)       | 114                  | 75  | 6   |          |
| Smoker (F)       | 19                   | 17  | 2   |          |
| Non-smoker (M)   | 13                   | 13  | 0   |          |
| Non-smoker (F)   | 70                   | 42  | 16  | 0.014    |
| Adenocarcinoma   |                      |     |     |          |
| Smoker (M)       | 75                   | 48  | 4   |          |
| Smoker (F)       | 15                   | 16  | 0   |          |
| Non-smoker (M)   | 11                   | 13  | 0   |          |
| Non-smoker (F)   | 63                   | 37  | 16  | 0.003    |

\*P-values were calculated by Fisher's exact test.

Abbreviation: M, male; F, female.

doi:10.1371/journal.pone.0073794.t004

II detoxifying enzymes, and ABC transporters [23–25]. ABCG2 is known to mediate the efflux of gefitinib (Iressa®) from cancer cells [39], and its expression is regulated by NRF2 [26] and the EGFR-tyrosine kinase cascade [40,41].

As revealed in the Kaplan-Meier plot (Figure 2), lung cancer patients (both females and males) with homozygous SNP alleles (-617A/A) in the *NRF2* gene had markedly high overall survival. Univariate analysis showed a significant difference between the -617 A/A and -617 C/A groups in terms of overall survival (log-rank  $P=0.021$ ). It is important to note that, except for one patient (case 5 in Table 5) who died because of primary pancreatic cancer, all of the adenocarcinoma patients with homozygous SNP alleles (-617A/A) in the *NRF2* gene survived over 1,000 days after surgical excision of the tumor that was followed up with neither adjuvant therapy nor chemotherapy, even when p-stage I patients were considered alone (Figure 2B). To our knowledge, this is the first report providing clinical evidence that homozygous SNP (-617A/A), as one of the intrinsic genetic polymorphisms in the *NRF2* gene, is associated with overall survival of lung cancer patients.

SNP -617C>A is considered to play a pivotal role in the positive feedback loop of transcriptional activation of the *NRF2* gene to regulate the NRF2 protein level (Figure 3). Since the SNP (c.-617A) in the ARE-like loci of the human *NRF2* gene decreases the binding affinity to the transcription factors of NRF2/small

**Table 5.** Clinicopathological profiling of 24 patients harboring homozygous SNP alleles (-617A/A) in the *NRF2* gene.

| Case | Histology | p stage | Age | Gender | smoker     | (GT)n repeats | CYP2A6 | EGFR mutation | Gefitinib therapy |
|------|-----------|---------|-----|--------|------------|---------------|--------|---------------|-------------------|
| 1    | Ad        | IIA     | 74  | F      | non-smoker | 19,30         | Wt     | Exon 21       | Yes               |
| 2    | Ad        | IA      | 53  | F      | non-smoker | 23            | *4/*4  | Exon 19       | -                 |
| 3    | Ad        | IB      | 70  | F      | non-smoker | 24            | Wt     | Exon 21       | -                 |
| 4    | Mix       | IB      | 63  | F      | non-smoker | 34            | Wt     | Exon 21       | -                 |
| †5   | Ad        | IB      | 61  | F      | non-smoker | 23            | Wt     | Exon 19       | -                 |
| 6    | Ad        | IB      | 72  | F      | non-smoker | 22            | Wt     | Exon 21       | -                 |
| 7    | Ad        | IA      | 40  | F      | non-smoker | 19            | Wt     | Exon 19       | -                 |
| 8    | Ad        | IA      | 71  | F      | non-smoker | 17            | Wt     | Exon 21       | -                 |
| 9    | Ad        | IA      | 45  | F      | non-smoker | 30            | Wt     | Exon 21       | -                 |
| 10   | Ad        | IA      | 74  | F      | non-smoker | 30            | Wt     | Exon 21       | -                 |
| 11   | Ad        | IA      | 73  | F      | non-smoker | 22            | Wt     | Exon 19       | -                 |
| 12   | Ad        | IA      | 69  | F      | non-smoker | 22            | Wt     | Exon 21       | -                 |
| 13   | Ad        | IA      | 62  | F      | non-smoker | 28            | Wt     | None          | -                 |
| 14   | Ad        | IA      | 73  | F      | non-smoker | 14            | Wt     | Exon 19       | -                 |
| 15   | Ad        | IA      | 63  | F      | non-smoker | 15            | Wt     | Exon 19       | -                 |
| 16   | Ad        | IIA     | 73  | F      | non-smoker | 30            | Wt     | None          | Yes               |
| 17   | Sq        | IA      | 72  | F      | smoker     | 20            | Wt     | None          | -                 |
| 18   | Ple       | IA      | 75  | F      | smoker     | 29            | Wt     | None          | -                 |
| 19   | Ad        | IA      | 74  | M      | smoker     | 23,27         | Wt     | None          | -                 |
| 20   | Sq        | IA      | 78  | M      | smoker     | 23            | Wt     | None          | -                 |
| 21   | Ad        | IA      | 65  | M      | smoker     | 30            | Wt     | Exon 21       | -                 |
| 22   | Sq        | IB      | 75  | M      | smoker     | 20            | Wt     | None          | -                 |
| 23   | Ad        | IA      | 77  | M      | smoker     | 28,31         | Wt     | Exon 21       | -                 |
| 24   | Ad        | IA      | 80  | M      | smoker     | 29,30         | Wt     | Exon 19       | -                 |

Abbreviation: Ad, adenocarcinoma; Mix, adenocarcinoma and squamous cell carcinoma; Ple, pleomorphic carcinoma; Sq, squamous cell carcinoma; F, female; M, male; Wt, wild type.

†Patient (case 5) died because of primary pancreatic cancer.

doi:10.1371/journal.pone.0073794.t005

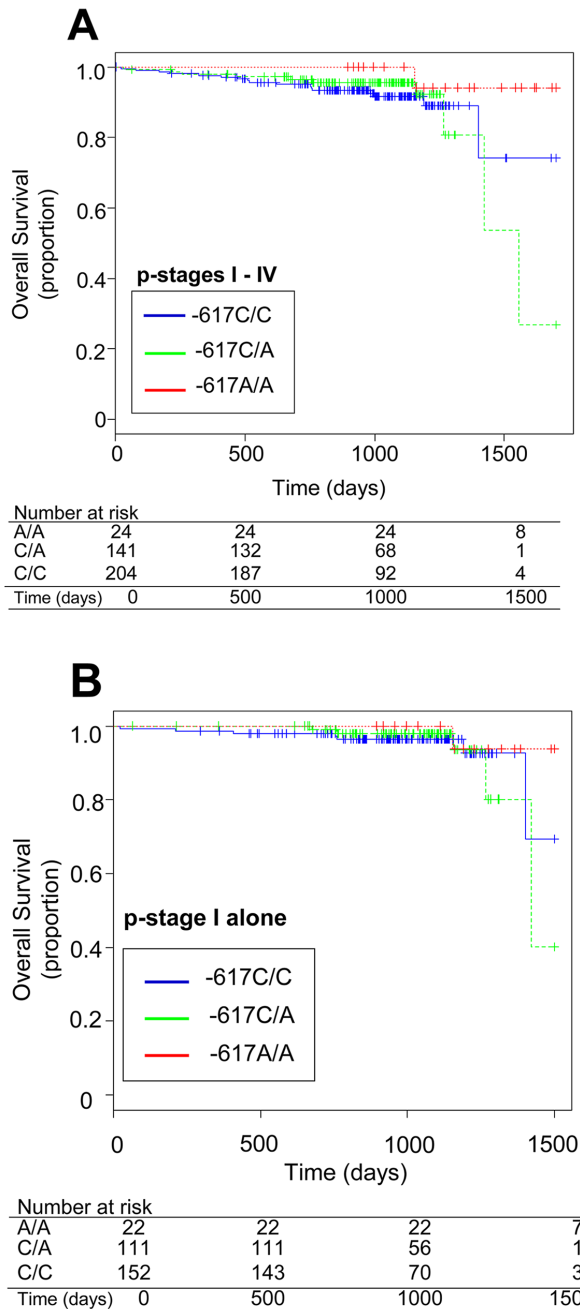

**Figure 2. Kaplan-Meier plots showing the overall survival of patients harboring the WT homozygote (-617C/C), WT/SNP heterozygote (-617C/A), or SNP homozygote (-617A/A) in the NRF2 gene.** Patients with p-stages I to IV (A) and p-stage I only NSCLC (B). The number of patients at times 0, 500, 1000, or 1500 days after surgical operation is described along with genotypes of the NRF2 gene. doi:10.1371/journal.pone.0073794.g002

MAF [22], it is anticipated that the homozygote -617A/A significantly attenuates the positive feedback loop of transcriptional activation of the NRF2 gene.

It has recently been reported that NRF2 regulates the basal expression of the murine double minute-2 (*Mdm2*) gene [42]. Since human MDM2 is an oncoprotein that binds to p53 protein and inactivates the tumor suppressor activity of p53 [43], NRF2 can indirectly contribute to p53-mediated cell cycle control and/or

**Table 6. Classification of primary lung cancer patients with respect to genotypes of NRF2 and MDM2 genes.**

|              | NRF2 (-617) |           |           |
|--------------|-------------|-----------|-----------|
|              | C/C         | C/A       | A/A       |
| Patients (N) | 216         | 147       | 24        |
| MDM2 (c.309) | N (%)       | N (%)     | N (%)     |
| T/T          | 35 (16.2)   | 36 (24.5) | 11 (45.8) |
| T/G          | 100 (46.3)  | 63 (42.9) | 10 (41.7) |
| G/G          | 81 (37.5)   | 48 (32.6) | 3 (12.5)  |

N, the number of patients; % in parentheses. doi:10.1371/journal.pone.0073794.t006

apoptosis [44]. One SNP in the *MDM2* promoter region, a T-to-G change at nucleotide c.309 (rs2279744) in the first intron, increases the binding affinity toward stimulatory protein 1 (Sp1) and results in higher expression levels of MDM2 protein [45]. This, in turn, attenuates the p53 tumor suppressor pathway and accelerates tumor formation in humans [45]. Asians, including Japanese, have higher frequencies of the 309G allele as compared with African-Americans and Caucasians [46]. It has been reported that this polymorphism in the *MDM2* gene is associated with the prognosis for several types of tumors, including lung cancer [47].

As demonstrated in Table 6, the 309G (SNP) allele frequency of the *MDM2* gene was markedly lower (0.333) in the genotype group of NRF2 -617A/A, as compared with those observed in the genotype groups of NRF2 -617C/C and -617C/A. It is suggested that lung cancer patients harboring both the 309T (WT) allele in the *MDM2* gene and the -617A allele in the NRF2 gene have better prognosis owing to well-controlled tumor suppression via

**Table 7. Frequencies of wild type (-617C) and SNP (-617A) alleles in the NRF2 gene among different ethnic groups.**

| Ethnic group           | Allele frequency |       | NRF2 (-617) |       |       | N   | Data source |
|------------------------|------------------|-------|-------------|-------|-------|-----|-------------|
|                        | C                | A     | C/C         | C/A   | A/A   |     |             |
| African                | 0.925            | 0.075 | 0.850       | 0.150 | 0.000 | 246 | *           |
| African-American       | 0.893            | 0.107 | 0.787       | 0.213 | 0.000 | 61  | *           |
| European               | 0.883            | 0.117 | 0.778       | 0.208 | 0.013 | 379 | *           |
| American in Utah       | 0.888            | 0.112 | 0.788       | 0.200 | 0.012 | 85  | *           |
| American mixed         | 0.862            | 0.138 | 0.757       | 0.210 | 0.033 | 181 | *           |
| Mexican in Los Angeles | 0.803            | 0.197 | 0.667       | 0.273 | 0.061 | 66  | *           |
| Japanese               | 0.775            | 0.225 | 0.618       | 0.315 | 0.067 | 89  | *           |
| Japanese (lung cancer) | 0.748            | 0.252 | 0.558       | 0.380 | 0.062 | 387 | This study  |
| Taiwanese              | 0.726            | 0.274 | 0.524       | 0.405 | 0.071 | 168 | This study  |
| Chinese in Beijing     | 0.722            | 0.278 | 0.515       | 0.412 | 0.072 | 97  | *           |
| Southern Han Chinese   | 0.710            | 0.290 | 0.500       | 0.420 | 0.080 | 100 | *           |

N, the number of subjects.

\*1000 Genomes. [http://browser.1000genomes.org/Homo\\_sapiens/Variation/Population?db=core;r=2:178129537-178130537;v=rs6721961;vdb=variation;vf=4574214](http://browser.1000genomes.org/Homo_sapiens/Variation/Population?db=core;r=2:178129537-178130537;v=rs6721961;vdb=variation;vf=4574214).

doi:10.1371/journal.pone.0073794.t007

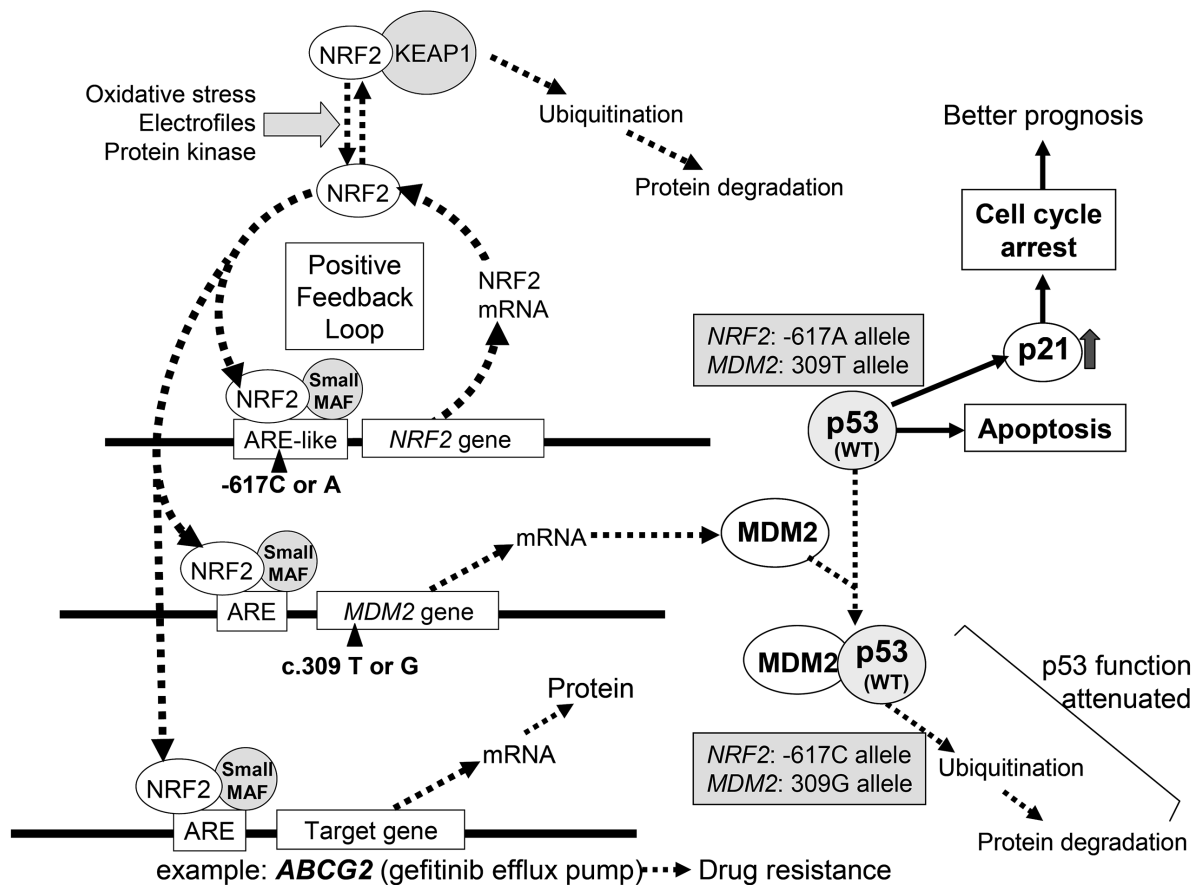

**Figure 3. Schematic illustration showing the effect of *NRF2* SNP-617C>A and *MDM2* SNP c.309 T>G on the p53-mediated suppression of cancer cell proliferation and drug resistance.** In response to oxidative stress, electrophiles challenge, or protein kinase-mediated phosphorylation (e.g., via the PI3K-Akt pathway), the NRF2 protein is released from KEAP1 and then translocated into the nuclei. The SNP-617C>A in the ARE-like motif is considered to play a role in the positive feedback loop of transcriptional activation of the *NRF2* gene. The SNP homozygote (-617 A/A) significantly attenuates the positive feedback loop and also expression of NRF2-target genes, such as *MDM2* and *ABCG2*. In the case of *MDM2* gene expression, the SNP (c.309 T>G) in the first intron of the *MDM2* gene increases the binding affinity toward Sp1 and results in higher expression levels of MDM2 protein. MDM2 protein, thus highly expressed, binds to p53 (wild type; Wt) protein and leads to ubiquitination and proteasomal degradation of p53 (Wt) protein. Combination of the 309G (SNP) allele of the *MDM2* gene and the -617C (Wt) allele of the *NRF2* gene may have negative impacts on p53 (Wt)-mediated tumor suppression. On the other hand, lung cancer patients harboring both the 309T (Wt) allele of the *MDM2* gene and the -617A (SNP) allele of the *NRF2* gene may have better prognosis due to the tumor suppressor function of p53 (Wt), such as apoptosis and p21<sup>WAF1/cip1</sup>-mediated cell cycle arrest. Expression of the *ABCG2* gene is known to be up-regulated by NRF2. Gefitinib, an inhibitor of EGFR tyrosine kinase, is extruded by ABCG2 out of cancer cells. Thus, NRF2-mediated induction of ABCG2 expression can confer cancer cells with acquired resistance to gefitinib and other anticancer drugs. doi:10.1371/journal.pone.0073794.g003

cell cycle arrest and/or apoptosis mediated by p53 (WT); refer to Figure 3. This may explain, in part, our finding that the lung cancer patients with homozygous SNP alleles (-617A/A) in the *NRF2* gene had markedly high overall survival rates (Figure 2).

In cancer tissues, somatic mutations take place frequently. In addition to the above-mentioned genetic polymorphisms as the “intrinsic” mechanism, mutations in the *KEAP1* and/or *NRF2* genes are the “acquired” mechanisms that lead to constitutive activation of NRF2. In fact, mutations in the *NRF2* and *KEAP1* genes have been found in carcinomas of the lung [12], breast [48], liver [49], and stomach [49]. Abnormalities in NRF2 activity were correlated with poor prognosis, when measured either as recurrence-free or overall 5-year survival. A recent immunohistochemical study has revealed that increased expression of NRF2 protein and decreased expression of KEAP1 protein are common abnormalities in NSCLC and are associated with poor prognosis [50]. Importantly, abnormal expression of NRF2 and KEAP1 proteins was more common than that of the corresponding gene

mutations [50], suggesting the involvement of other mechanisms such as intrinsic genetic polymorphisms of those genes. To bridge the gap between the homozygous SNP alleles (-617A/A) in the *NRF2* gene and the high overall survival of lung cancer patients shown in this study, we need to carry out further clinical follow-up studies with lung cancer patients (p-stages III and IV) who have been subjected to chemotherapeutic treatments. As exemplified in the present study, genetic polymorphisms/mutations and fine balances among NRF2, KEAP1, MDM2, p53, p21<sup>WAF1/cip1</sup> and other genes are likely to contribute to the progression of cancer and, consequently, the prognosis of cancer patients.

#### Development of a Rapid Genotyping Method for Personalized Cancer Therapy

One of the challenges in lung cancer management is to identify biomarkers for personalized cancer therapy. To effectively advance personalized medicine, cost-effective methods should be developed for genotyping. It would be desirable to include such



information in each patient's record as guidance for medial doctors to provide individualized treatment. In the present study, we have developed a rapid genetic testing method to elucidate the impact of genetic polymorphisms in the *NRF2* gene on the risk and survival of patients with primary lung cancer. The method enables the detection of genetic polymorphisms in target genes within 30 to 45 minutes under isothermal conditions that do not require DNA isolation and PCR amplification. Thus, this genotyping method would provide a simple and practical tool for personalized cancer therapy and assessment of prognosis.

## Materials and Methods

### Patients and Sample Collection

This clinical research was conducted according to the Declaration of Helsinki Principles. Under written informed consent, we collected blood samples from patients with primary lung cancer who received surgical operation at the Kanagawa Cancer Center. Protocols for sample collection, anonymity, storage, and transportation to RIKEN Yokohama Institute required for the present study were approved by both the Institutional Review Board of the Kanagawa Cancer Center Research Institute and the Research Ethics Committee at RIKEN Yokohama Institute. Procedures for analyzing the *HO-1* gene 5'-flanking region sequence as well as for genotyping the *NRF2*, *CYP2A6*, and *MDM2* genes in the genomic DNA samples were approved by the Research Ethics Committee at RIKEN Yokohama Institute.

The Taiwanese samples (N = 168) used in this study were randomly selected from the Han-Chinese Cell and Genome Bank in Taiwan described previously [51], in which more than 3,300 healthy controls were collected and randomly selected through registry.

### Preparation of Genomic DNA

Peripheral venous blood samples from lung cancer patients were collected into tubes containing Na<sub>2</sub>EDTA. Genomic DNA was extracted by the use of the QIAamp blood kit (QIAGEN K.K., Tokyo, Japan) according to the manufacturer's instructions.

### Genotyping

Based on the SmartAmp method, rapid genotyping primers were developed for detecting both the SNP (c.-617C/A) in the ARE-like loci of the human *NRF2* gene (Figure 1) and the *CYP2A6\*4* genotype (whole gene deletion) [51]. We used exciton-controlled hybridization-sensitive fluorescent primers for optical detection of genotyping reactions (Figure 1). After genomic DNA was denatured at 98°C for 3 min, the genotyping reactions were allowed to proceed isothermally at 60°C for 60 min in a Mx3000P PCR system (Agilent Technologies, Santa Clara, CA, USA). The SNP c.309T>G in of the *MDM2* gene were detected by the Duplex SmartAmp method, as described previously [46].

### Analysis of Length Variability of (GT)<sub>n</sub> Repeats in the *HO-1* Gene Promoter

The partial genomic DNA including (GT)<sub>n</sub> repeats located in the 5'-flanking region of the *HO-1* gene was amplified by the polymerase chain reaction (PCR) [53,54] with a fluorescence probe-labeled sense primer p1-s (5'-AGAGCCTGCAGCTTCT-CAGA-3') and an unlabeled anti-sense primer p1-as (5'-

ACAAAGTCTGGCCATAGGAC-3'). These primers were designed according to the previously reported sequences [55]. The PCR cycle program of 95°C for 30 seconds, 63°C for 30 seconds, and 60°C for 30 seconds was carried out for a total of 30 cycles. The resulting PCR products were visualized by electrophoresis in 3% agarose gels containing ethidium bromide. The electrophoresis revealed two differently-sized PCR products attributable to two alleles with different (GT)<sub>n</sub> repeat sequences in the *HO-1* gene. The (GT)<sub>n</sub> repeats in the PCR products were analyzed with a laser-based automated DNA sequencer (ABI PRISM 3100 DNA Analyzer, Applied Biosystems Ltd., Tokyo, Japan).

### Analysis of Mutation Status in the *EGFR* Gene

DNA samples were isolated from frozen tissues or formalin-fixed and paraffin-embedded tissue sections that had been surgically excised from lung cancer loci. Epidermal growth factor receptor (*EGFR*) gene exons 19 and 21 were analyzed for their mutational status by the loop-hybrid mobility shift assay, a PCR-based heteroduplex analysis method, as described previously [56,57].

### Statistical Analysis

The association of lung cancer with the allele frequency of the gene of interest was assessed by considering the confounding effects derived from known risk factors, such as age, gender, smoking history, and histopathology. After preliminary bivariate analysis by using Fisher's exact test or  $\chi^2$  test, the multivariate logistic regression method was performed to estimate independent variables associated with the SNP homozygote (-617A/A) in the *NRF2* gene. Furthermore, the Kaplan-Meier method was used to estimate survival curves for overall survival. Log-rank tests were used to compare the survival curves of patients in different *NRF2* subgroups. The statistical significance of all the data was tested by the analysis of variance. We performed statistical analysis with the SPSS statistics program (v.19.0; SPSS Inc., Chicago, USA). Values of  $P < 0.05$  were considered to indicate statistical significance.

## Supporting Information

### Table S1 Classification of female adenocarcinoma patients with respect to genotypes of *NRF2* and *MDM2* genes.

(DOC)

## Acknowledgments

The authors thank Dr. Taisei Mushirola (RIKEN Center for Integrative Medical Sciences) for his kind advice on the ethnic difference of *NRF2* genotypes. In addition, thanks go to members of the SmartAmp team for their generous support in performing the DNA sequencing experiments at RIKEN Omics Science Center.

## Author Contributions

Conceived and designed the experiments: YO UN AL YI YN TK YH. Performed the experiments: YO UN YE AL HK. Analyzed the data: YO TI SM MT. Contributed reagents/materials/analysis tools: YO UN YE AL HK. Wrote the paper: YO TI. Wrote the research plan: TI. Contributed to the sample collection: YM HN MTML TY. Contributed to the clinical study: YM HN MTML TY.

## References

- Centers for Disease Control and Prevention (CDC) website. Available: [http://www.cdc.gov/cancer/lung/basic\\_info/risk\\_factors.html](http://www.cdc.gov/cancer/lung/basic_info/risk_factors.html). Accessed 2013 Feb 10.
- National Cancer Institute (NCI) website. Available: <http://www.cancer.gov/cancertopics/types/lung>. Accessed 2013 Feb 10.

3. Stämpfli MR, Anderson GP (2009) How cigarette smoke skews immune responses to promote infection, lung disease and cancer. *Nature Reviews* 9: 377–84.
4. Motohashi H, Yamamoto M (2004) Nrf2-Keap1 defines a physiologically important stress response mechanism. *Trends Mol Med* 10: 549–57.
5. Kobayashi M, Yamamoto M (2006) Nrf2-Keap1 regulation of cellular defense mechanisms against electrophiles and reactive oxygen species. *Adv Enzyme Regul* 46: 113–40.
6. Nguyen T, Nioi P, Pickett CB (2009) The Nrf2-antioxidant response element signaling pathway and its activation by oxidative stress. *J Biol Chem* 284: 13291–5.
7. Lau A, Villeneuve NF, Sun Z, Wong PK, Zhang DD (2008) Dual roles of Nrf2 in cancer. *Pharmacol Res* 58: 262–70.
8. Homma S, Ishii Y, Morishima Y, Yamadori T, Matsuno Y, et al. (2009) Nrf2 enhances cell proliferation and resistance to anticancer drugs in human lung cancer. *Clin Cancer Res* 15: 3423–32.
9. Hayes JD, McMahon M (2009) *NRF2* and *KEAP1* mutations: permanent activation of an adaptive response in cancer. *Trends Biochem Sci* 34: 176–88.
10. Taguchi K, Motohashi H, Yamamoto M (2011) Molecular mechanisms of the Keap1-Nrf2 pathway in stress response and cancer evolution. *Genes Cells* 16: 123–40.
11. Yamadori T, Ishii Y, Homma S, Morishima Y, Kurishima K, et al. (2012) Molecular mechanisms for the regulation of Nrf2-mediated cell proliferation in non-small-cell lung cancers. *Oncogene* 31: 4768–77.
12. Sporn MB, Liby KT (2012) NRF2 and cancer: the good, the bad and the importance of context. *Nature Rev Cancer* 12: 564–71.
13. Moi P, Chan K, Asunis I, Cao A, Kan YW (1994) Isolation of NF-E2-related factor 2 (Nrf2), a NF-E2-like basic leucine zipper transcriptional activator that binds to the tandem NF-E2/AP1 repeat of the beta-globin locus control region. *Proc Natl Acad Sci U S A* 91: 9926–30.
14. Itoh K, Wakabayashi N, Katoh Y, Ishii Y, Igarashi K, et al. (1999) Keap1 represses nuclear activation of antioxidant responsive elements by Nrf2 through binding to the amino-terminal Neh2 domain. *Genes Dev* 13: 76–86.
15. Itoh K, Igarashi K, Hayashi N, Nishizawa M, Yamamoto M (1995) Cloning and characterization of a novel erythroid cell-derived CNC family transcription factor heterodimerizing with the small Maf family proteins. *Mol Cell Biol* 15: 4184–93.
16. Ishii T, Itoh K, Takahashi S, Sato H, Yanagawa T, et al. (2000) Transcription factor Nrf2 coordinately regulates a group of oxidative stress-inducible genes in macrophages. *J Biol Chem* 275: 16023–9.
17. Ramos-Gomez M, Kwak MK, Dolan PM, Itoh K, Yamamoto M, et al. (2001) Sensitivity to carcinogenesis is increased and chemoprotective efficacy of enzyme inducers is lost in nrf2 transcription factor-deficient mice. *Proc Natl Acad Sci USA* 98: 3410–5.
18. Cho HY, Reddy SP, DeBiase A, Yamamoto M, Kleeberger SR (2005) Gene expression profiling of NRF2-mediated protection against oxidative injury. *Free Radic Biol Med* 38: 325–43.
19. Kwak MK, Itoh K, Yamamoto M, Kensler TW (2002) Enhanced expression of the transcription factor Nrf2 by cancer chemopreventive agents: role of antioxidant response element-like sequences in the nrf2 promoter. *Mol Cell Biol* 22: 2883–92.
20. Mitsuishi Y, Taguchi K, Kawatani Y, Shibata T, Nukiwa T, et al. (2012) Nrf2 redirects glucose and glutamine into anabolic pathways in metabolic reprogramming. *Cancer Cell* 22: 66–79.
21. Yamamoto T, Yoh K, Kobayashi A, Ishii Y, Kure S, et al. (2004) Identification of polymorphisms in the promoter region of the human NRF2 gene. *Biochem Biophys Res Commun* 321: 72–9.
22. Marzec JM, Christie JD, Reddy SP, Jedlica AE, Vuong H, et al. (2007) Functional polymorphisms in the transcription factor *NRF2* in humans increase the risk of acute lung injury. *FASEB* 21: 2237–46.
23. Nakata K, Tanaka Y, Nakano T, Adachi T, Tanaka H, et al. (2006) Nuclear receptor-mediated transcription regulation in phase I, II, and III xenobiotic metabolizing systems. *Drug Metab Pharmacokinet* 21: 437–57.
24. Shen G, Kong AN (2009) Nrf2 plays an important role in coordinated regulation of phase II drug metabolism enzymes and phase III drug transporters. *Biopharm Drug Dispos* 30: 345–55.
25. Adachi T, Nakagawa H, Chung I, Hagiya Y, Hoshijima K, et al. (2007) Nrf2-dependent and -independent induction of ABC transporters ABCC1, ABCC2, and ABCG2 in HepG2 cells under oxidative stress. *J Exp Ther Oncol* 6: 335–48.
26. Sing A, Wu H, Zhang P, Happel C, Ma J, et al. (2010) Expression of *ABCG2* (*BCRP*) is regulated by Nrf2 in cancer cells that confers side population and chemoresistance phenotype. *Mol Cancer Ther* 9: 2365–76.
27. Mitani Y, Lezhava A, Kawai Y, Kikuchi T, Oguchi-Katayama A, et al. (2007) Rapid SNP diagnostics using asymmetric isothermal amplification and a new mismatch-suppression technology. *Nat Methods* 4: 257–62.
28. Ishikawa T, Hayashizaki Y (2013) Clinical SNP detection by SmartAmp method. *Methods Mol Biol* 1015: 55–69.
29. Travis WD, Brambilla E, Müller-Hermelink HK, Harris CC (2004) Pathology and genetics of tumours of the lung, pleura, thymus and heart. Lyon, France: IARC Press.
30. Hsiung CA, Lan Q, Hong YC, Chen CJ, Hosgood HD, et al. (2010) The 5p15.33 locus is associated with risk of lung adenocarcinoma in never-smoking females in Asia. *PLoS Genet* 6: pii: e1001051.
31. Hosgood HD 3rd, Wang WC, Hong YC, Wang JC, Chen K, et al. (2012) Genetic variant in TP63 on locus 3q28 is associated with risk of lung adenocarcinoma among never-smoking females in Asia. *Hum Genet* 131: 1197–203.
32. Lan Q, Hsiung CA, Matsuo K, Hong YC, Seow A, et al. (2012) Genome-wide association analysis identifies new lung cancer susceptibility loci in never-smoking women in Asia. *Nature Genet* 44: 1330–5.
33. Toyooka S, Matsuo K, Shigeharu H, Kosaka T, Tokumo M, et al. (2007) The impact of sex and smoking status on the mutational spectrum of epidermal growth factor receptor gene in non small cell lung cancer. *Clin Cancer Res* 13: 5622–5.
34. Ladanyi M, Pao W (2008) Lung adenocarcinoma: guiding EGFR-targeted therapy and beyond. *Mod Pathol* 21 Suppl 2: S16–22.
35. Fukuoka M, Wu YL, Thongprasert S, Sunpaweravong P, Leong SS, et al. (2011) Biomarker analyses and final overall survival results from a phase III, randomized, open-label, first-line study of gefitinib versus carboplatin/paclitaxel in clinically selected patients with advanced non-small-cell lung cancer in Asia (IPASS). *J Clin Oncol* 29: 2866–74.
36. Paez JG, Janne PA, Lee JC, Tracy S, Greulich H, et al. (2004) EGFR mutations in lung cancer: correlation with clinical response to gefitinib therapy. *Science* 304: 1497–500.
37. Lynch TJ, Bell DW, Sordella R, Gurubhagavata S, Okimoto RA, et al. (2004) Activating mutations in the epidermal growth factor receptor underlying responsiveness of non-small-cell lung cancer to gefitinib. *N Engl J Med* 350: 2129–39.
38. Pao W, Miller V, Zakowski M, Doherty J, Politi K, et al. (2004) EGF receptor gene mutations are common in lung cancers from “never smokers” and are associated with sensitivity of tumors to gefitinib and erlotinib. *Proc Natl Acad Sci U S A* 101: 13306–11.
39. Saito H, Hirano H, Nakagawa H, Fukami T, Oosumi K, et al. (2006) A new strategy of high-speed screening and quantitative structure-activity relationship analysis to evaluate human ATP-binding cassette transporter ABCG2-drug interactions. *J Pharmacol Exp Ther* 317: 1114–24.
40. Meyer zu Schwabedissen HE, Grube M, Dreisbach A, Jedlitschky G, Meissner K, et al. (2006) Epidermal growth factor-mediated activation of the map kinase cascade results in altered expression and function of ABCG2 (BCRP). *Drug Metab. Dispos.* 34: 524–33.
41. Huang WC, Chen YJ, Li LY, Wei YL, Hsu SC, et al. (2011) Nuclear translocation of epidermal growth factor receptor by Akt-dependent phosphorylation enhances breast cancer-resistant protein expression in gefitinib-resistant cells. *J. Biol. Chem.* 286: 20558–68.
42. You A, Nam CW, Wakabayashi N, Yamamoto M, Kensler TW, et al. (2011) Transcriptional factor Nrf2 maintains the basal expression of Mdm2: An implication of the regulation of p53 signaling by Nrf2. *Arch Biochem Biophys* 507: 356–364.
43. Freedman DA, Wu L, Levine AJ (1999) Functions of the MDM2 oncoprotein. *Cell Mol Life Sci* 55: 96–107.
44. Rotblat B, Melino G, Knight RA (2012) NRF2 and p53: Januses in cancer? *Oncotarget* 3: 1272–1283.
45. Bond GL, Hu WW, Bond EE, Robins H, Lutzker SG, et al. (2004) A single nucleotide polymorphism in the MDM2 promoter attenuates the p53 tumor suppressor pathway and accelerates tumor formation in humans. *Cell* 119: 591–602.
46. Enokida Y, Shimizu K, Atsumi J, Lezhava A, Tanaka Y, et al. (2013) Rapid detection of SNP (c.309T>G) in the MDM2 gene by the Duplex SmartAmp method. *PLoS One* 8: e60151.
47. Han JY, Lee GK, Jang DH, Lee SY, Lee JS (2008) Association of p53 codon 72 polymorphism and MDM2 SNP309 with clinical outcome of advanced nonsmall cell lung cancer. *Cancer* 113: 799–807.
48. Sjöblom T, Jones S, Wood LD, Parsons DW, Lin J, et al. (2006) The consensus coding sequences of human breast and colorectal cancers. *Science* 314: 268–74.
49. Yoo NJ, Kim HR, Kim YR, An CH, Lee SH (2012) Somatic mutations of the *KEAP1* gene in common solid cancers. *Histopathology* 60: 943–52.
50. Solis LM, Behrens C, Dong W, Suraokar M, Ozburn NC, et al. (2010) Nrf2 and Keap1 abnormalities in non-small cell lung carcinoma and association with clinicopathologic features. *Clin Cancer Res* 16: 3743–53.
51. Pan WH, Fann CS, Wu JY, Hung YT, Ho MS, et al. (2006) Han Chinese cell and genome bank in Taiwan: purpose, design and ethical considerations. *Hum Hered* 61: 27–30.
52. Azuma K, Lezhava A, Shimizu M, Kimura Y, Ishizu Y, et al. (2011) Direct genotyping of *Cytochrome P450 2A6* whole gene deletion from human blood samples by the SmartAmp method. *Clin Chim Acta* 412: 1249–51.
53. Kimpara T, Takeda A, Watanabe K, Itoyama Y, Ikawa S, et al. (1997) Microsatellite polymorphism in the human heme oxygenase-1 gene promoter and its application in association studies with Alzheimer and Parkinson disease. *Hum Genet* 100: 145–7.
54. Okinaga S, Takahashi K, Takeda K, Yoshizawa M, Fujita H, et al. (1996) Regulation of human heme oxygenase-1 gene expression under thermal stress. *Blood* 87: 5074–84.
55. Shibahara S, Sato M, Muller RM, Yoshida T (1989) Structural organization of the human heme oxygenase gene and the function of its promoter. *Eur J Biochem* 179: 557–63.
56. Oshita F, Matsukuma S, Yoshihara M, Sakuma Y, Ohgane N, et al. (2006) Novel heteroduplex method using small cytology specimens with a remarkably

high success rate for analysing EGFR gene mutations with a significant correlation to gefitinib efficacy in non-small-cell lung cancer. *Br J Cancer* 95: 1070–5.

57. Matsukuma S, Yoshihara M, Kasai F, Kato A, Yoshida A, et al. (2006) Rapid and simple detection of hot spot point mutations of epidermal growth factor receptor, BRAF, and NRAS in cancers using the loop-hybrid mobility shift assay. *J Mol Diagn* 8: 504–12.
